# Supplementary material for: Photocatalytic Nanocomposites for the Protection of European Architectural Heritage
Source: PubMed Central journal article supplement (PMC5793563; doi:10.3390/ma11010065), 2018-01-03
Supplement: materials-11-00065-s001.pdf [file materials-11-00065-s001.pdf]

Supplementary

# Photocatalytic Nanocomposites for the Protection of European Architectural Heritage

Francesca Gherardi, Marco Roveri \*, Sara Goidanich and Lucia Toniolo

Supplementary Materials

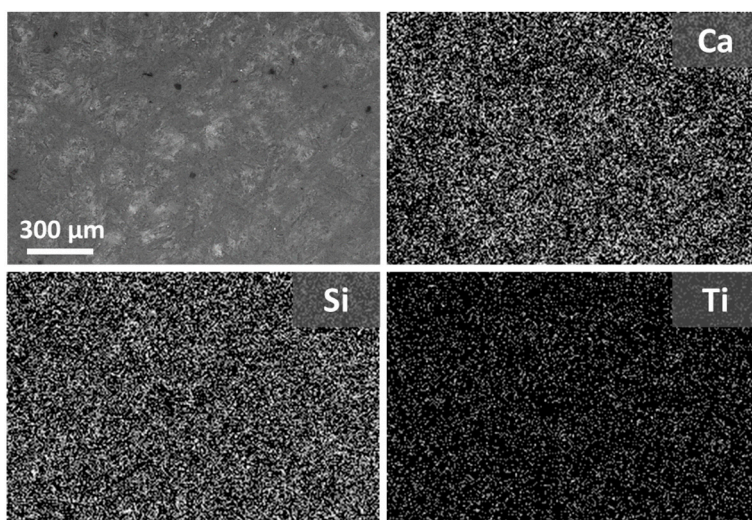

**Figure S1.** ESEM-EDX images of Apuan marble treated with WNC and Ca, Si and Ti maps of distribution.

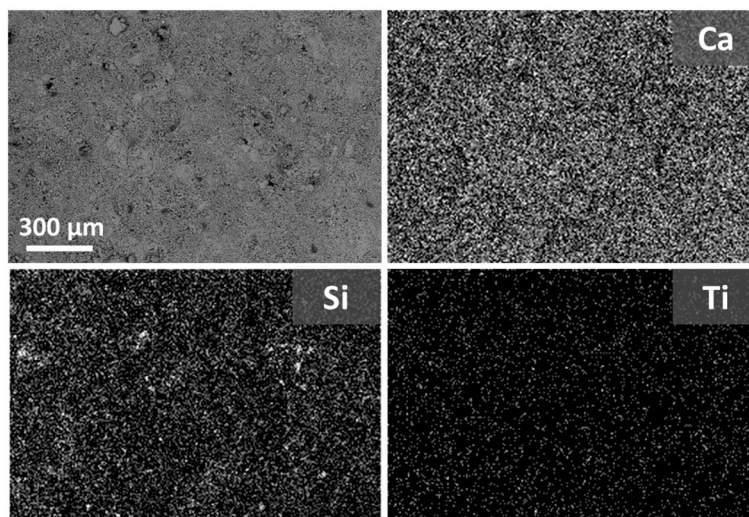

**Figure S2.** ESEM-EDX images of Ajarte limestone treated with WNC and Ca, Si and Ti maps of distribution.
